# Supplementary material for: Associations of Infant Feeding, Sleep, and Weight Gain with the Toddler Gut Microbiome
Source: MDPI journal article supplement (doi:10.3390/microorganisms12030549), 2024-03-09
Supplement: s1 [file s1]

## Supplementary Table

**Supplementary Table S1.** Alpha diversity results for all feeding, sleeping and growth variables.

| Testing Variable                     | Diversity Metric | Median (IQR) |              | H     | p-value |
|--------------------------------------|------------------|--------------|--------------|-------|---------|
|                                      |                  | Category 1   | Category 2   |       |         |
| Mode of birth                        | Shannon          | 4.64 (0.50)  | 4.76 (1.27)  | 0.335 | 0.563   |
| Category 1: Vaginal                  | Observed OTUs    | 92 (43)      | 91 (53)      | 0.055 | 0.814   |
| Category 2: C-section                | FaithPD          | 9.22 (3.15)  | 7.96 (3.42)  | 1.424 | 0.233   |
|                                      | Evenness         | 0.73 (0.10)  | 0.73 (0.11)  | 0.633 | 0.426   |
| Original study intervention          | Shannon          | 4.55 (0.80)  | 4.82 (0.87)  | 0.366 | 0.545   |
| Category 1: Control                  | Observed OTUs    | 82 (40)      | 103 (40)     | 2.193 | 0.139   |
| Category 2: Intervention             | FaithPD          | 7.72 (2.66)  | 9.80 (2.37)  | 2.955 | 0.086   |
|                                      | Evenness         | 0.73 (0.10)  | 0.72 (0.13)  | 0.025 | 0.874   |
| Age of starting solids               | Shannon          | 4.76 (0.87)  | 4.44 (1.45)  | 2.637 | 0.104   |
| Category 1: Before 6 months          | Observed OTUs    | 91 (43)      | 63 (45)      | 1.822 | 0.177   |
| Category 2: 6 months and after       | FaithPD          | 8.70 (2.94)  | 6.81 (3.40)  | 1.156 | 0.282   |
|                                      | Evenness         | 0.73 (0.12)  | 0.69 (0.16)  | 2.348 | 0.125   |
| Any breastfeeding at 1 month         | Shannon          | 4.55 (0.58)  | 4.76 (1.04)  | 0.404 | 0.525   |
| Category 1: No                       | Observed OTUs    | 80 (37)      | 93 (39)      | 0.321 | 0.571   |
| Category 2: Yes                      | FaithPD          | 8.55 (3.44)  | 8.70 (3.06)  | 0.024 | 0.877   |
|                                      | Evenness         | 0.71 (0.07)  | 0.73 (0.13)  | 0.248 | 0.619   |
| Any breastfeeding at 6 months        | Shannon          | 4.55 (0.55)  | 4.89 (1.28)  | 0.161 | 0.688   |
| Category 1: No                       | Observed OTUs    | 91 (44)      | 86 (47)      | 0.136 | 0.712   |
| Category 2: Yes                      | FaithPD          | 8.55 (3.20)  | 8.70 (3.54)  | 0.002 | 0.962   |
|                                      | Evenness         | 0.72 (0.10)  | 0.74 (0.15)  | 0.114 | 0.736   |
| Any breastfeeding at 12 months       | Shannon          | 4.65 (0.65)  | 4.76 (1.41)  | 0.117 | 0.732   |
| Category 1: No                       | Observed OTUs    | 87 (45)      | 104 (55)     | 2.147 | 0.143   |
| Category 2: Yes                      | FaithPD          | 8.46 (3.29)  | 9.84 (4.70)  | 2.202 | 0.138   |
|                                      | Evenness         | 0.73 (0.11)  | 0.69 (0.15)  | 0.036 | 0.849   |
| Exclusive breastfeeding at 1 month   | Shannon          | 4.75 (0.73)  | 4.53 (1.11)  | 0.123 | 0.726   |
| Category 1: No                       | Observed OTUs    | 92 (45)      | 85 (45)      | 0.134 | 0.714   |
| Category 2: Yes                      | FaithPD          | 8.78 (2.92)  | 8.55 (3.67)  | 0.001 | 0.975   |
|                                      | Evenness         | 0.73 (0.08)  | 0.70 (0.12)  | 0.328 | 0.567   |
| Exclusive breastfeeding at 6 months  | Shannon          | 4.65 (0.80)  | 4.72 (1.16)  | 0.125 | 0.724   |
| Category 1: No                       | Observed OTUs    | 87 (43)      | 95 (58)      | 0.499 | 0.48    |
| Category 2: Yes                      | FaithPD          | 8.47 (3.05)  | 9.06 (5.45)  | 0.08  | 0.778   |
|                                      | Evenness         | 0.72 (0.11)  | 0.74 (0.13)  | 0.125 | 0.724   |
| Exclusive breastfeeding at 12 months | Shannon          | 4.65 (1.00)  | 4.76 (0.25)  | 0.076 | 0.782   |
| Category 1: No                       | Observed OTUs    | 87 (46)      | 109 (23)     | 1.074 | 0.3     |
| Category 2: Yes                      | FaithPD          | 8.62 (3.40)  | 10.07 (2.44) | 0.577 | 0.447   |
|                                      | Evenness         | 0.73 (0.12)  | 0.71 (0.07)  | 0.019 | 0.89    |
| Bed-sharing at 1 month               | Shannon          | 4.54 (0.81)  | 5.05 (0.70)  | 4.335 | 0.037   |
| Category 1: No                       | Observed OTUs    | 82 (43)      | 118 (23)     | 5.194 | 0.023   |
| Category 2: Yes                      | FaithPD          | 8.36 (3.39)  | 9.98 (1.79)  | 3.409 | 0.065   |
|                                      | Evenness         | 0.72 (0.12)  | 0.76 (0.09)  | 2.228 | 0.135   |
| Bedtime at 1 month                   | Shannon          | 4.89 (0.29)  | 4.55 (0.88)  | 0.324 | 0.569   |
| Category 1: <21:00                   | Observed OTUs    | 97 (22)      | 86 (47)      | 0.081 | 0.776   |
| Category 2: ≥21:00                   | FaithPD          | 8.99 (2.04)  | 8.70 (3.73)  | 0     | 1       |
|                                      | Evenness         | 0.73 (0.06)  | 0.73 (0.12)  | 0.155 | 0.694   |
| Number of wakes at 1 month           | Shannon          | 4.55 (0.91)  | 4.92 (0.83)  | 0.446 | 0.504   |
| Category 1: ≤3                       | Observed OTUs    | 86 (42)      | 97 (38)      | 0.014 | 0.906   |
| Category 2: >3                       | FaithPD          | 8.70 (2.94)  | 8.89 (3.37)  | 0.002 | 0.969   |
|                                      | Evenness         | 0.71 (0.13)  | 0.75 (0.04)  | 1.043 | 0.307   |
| Max sleep bout at 1 month            | Shannon          | 4.64 (0.69)  | 4.90 (0.87)  | 0.337 | 0.562   |
| Category 1: ≤4 h                     | Observed OTUs    | 85 (52)      | 96 (36)      | 0.182 | 0.669   |
| Category 2: >4 h                     | FaithPD          | 7.80 (3.85)  | 9.02 (1.32)  | 0.514 | 0.473   |
|                                      | Evenness         | 0.73 (0.12)  | 0.73 (0.15)  | 0.057 | 0.811   |
| Night Sleep at 1 month               | Shannon          | 4.90 (0.87)  | 4.54 (0.74)  | 2.228 | 0.135   |
| Category 1: ≤10 h                    | Observed OTUs    | 96 (47)      | 86 (23)      | 0.347 | 0.556   |
| Category 2: >10 h                    | FaithPD          | 9.02 (3.22)  | 8.25 (2.01)  | 0.5   | 0.48    |
|                                      | Evenness         | 0.74 (0.10)  | 0.67 (0.06)  | 3.125 | 0.077   |
| Daytime sleep at 1 month             | Shannon          | 4.53 (1.11)  | 4.81 (0.55)  | 1.95  | 0.163   |
| Category 1: ≤8 h                     | Observed OTUs    | 83 (45)      | 103 (28)     | 1.951 | 0.162   |

|                                          |               |              |             |        |       |
|------------------------------------------|---------------|--------------|-------------|--------|-------|
| Category 2: >8 h                         | FaithPD       | 8.62 (3.25)  | 9.42 (2.62) | 0.963  | 0.326 |
|                                          | Evenness      | 0.72 (0.12)  | 0.73 (0.09) | 2.167  | 0.141 |
| Nap frequency at 1 month                 | Shannon       | 4.81 (0.70)  | 4.52 (1.06) | 0.154  | 0.694 |
| Category 1: ≤4                           | Observed OTUs | 86 (44)      | 107 (58)    | 1.581  | 0.209 |
| Category 2: >4                           | FaithPD       | 8.55 (2.75)  | 9.64 (5.31) | 1.21   | 0.271 |
|                                          | Evenness      | 0.74 (0.08)  | 0.65 (0.11) | 0.747  | 0.387 |
| 24hTST at 1 month                        | Shannon       | 4.55 (0.88)  | 4.75 (0.33) | 0.048  | 0.827 |
| Category 1: ≤18 h                        | Observed OTUs | 83 (46)      | 95 (34)     | 0.243  | 0.622 |
| Category 2: >18 h                        | FaithPD       | 9.00 (3.20)  | 8.46 (2.77) | 0      | 1     |
|                                          | Evenness      | 0.74 (0.12)  | 0.71 (0.10) | 0.001  | 0.971 |
| Proportion of night to 24TST at 1 month  | Shannon       | 4.92 (0.88)  | 4.47 (0.70) | 4.395  | 0.036 |
| Category 1: ≤0.56                        | Observed OTUs | 101 (48)     | 80 (17)     | 1.922  | 0.166 |
| Category 2: >0.56                        | FaithPD       | 9.23 (3.33)  | 7.96 (2.49) | 2.444  | 0.118 |
|                                          | Evenness      | 0.75 (0.10)  | 0.69 (0.08) | 4.102  | 0.043 |
| Bedtime at 6 months                      | Shannon       | 4.99 (0.50)  | 4.54 (1.00) | 1.986  | 0.159 |
| Category 1: <21:00                       | Observed OTUs | 95 (42)      | 89 (46)     | 0.162  | 0.687 |
| Category 2: ≥21:00                       | FaithPD       | 9.37 (2.59)  | 8.47 (3.41) | 0.253  | 0.615 |
|                                          | Evenness      | 0.78 (0.06)  | 0.71 (0.12) | 2.759  | 0.097 |
| Number of wakes at 6 months              | Shannon       | 4.90 (0.87)  | 4.51 (0.92) | 2.838  | 0.092 |
| Category 1: ≤1                           | Observed OTUs | 98 (45)      | 82 (33)     | 1.298  | 0.255 |
| Category 2: >1                           | FaithPD       | 9.05 (3.17)  | 7.96 (3.01) | 1.773  | 0.183 |
|                                          | Evenness      | 0.74 (0.08)  | 0.66 (0.10) | 2.132  | 0.144 |
| Max sleep bout at 6 months               | Shannon       | 4.55 (0.69)  | 4.74 (0.88) | 0.344  | 0.558 |
| Category 1: ≤7 h                         | Observed OTUs | 91 (41)      | 83 (47)     | 0.274  | 0.601 |
| Category 2: >7 h                         | FaithPD       | 9.00 (3.47)  | 7.96 (3.34) | 1.265  | 0.261 |
|                                          | Evenness      | 0.74 (0.13)  | 0.72 (0.12) | 0.464  | 0.496 |
| Night Sleep at 6 months                  | Shannon       | 4.54 (1.11)  | 4.81 (0.73) | 0.002  | 0.962 |
| Category 1: ≤9 h                         | Observed OTUs | 96 (46)      | 83 (31)     | 1.607  | 0.205 |
| Category 2: >9 h                         | FaithPD       | 9.02 (2.85)  | 7.64 (3.11) | 1.988  | 0.159 |
|                                          | Evenness      | 0.73 (0.12)  | 0.73 (0.09) | 0.183  | 0.669 |
| Daytime sleep at 6 months                | Shannon       | 4.55 (0.95)  | 4.74 (0.79) | 0.892  | 0.345 |
| Category 1: ≤5 h                         | Observed OTUs | 83 (45)      | 115 (34)    | 4.248  | 0.039 |
| Category 2: >5 h                         | FaithPD       | 7.48 (3.34)  | 9.87 (1.88) | 8.621  | 0.003 |
|                                          | Evenness      | 0.73 (0.12)  | 0.70 (0.15) | 0.05   | 0.823 |
| Nap frequency at 6 months                | Shannon       | 4.76 (0.90)  | 4.51 (1.04) | 2.031  | 0.154 |
| Category 1: ≤3                           | Observed OTUs | 91 (45)      | 82 (48)     | 0.382  | 0.536 |
| Category 2: >3                           | FaithPD       | 8.40 (3.24)  | 9.00 (3.83) | 0.184  | 0.668 |
|                                          | Evenness      | 0.74 (0.09)  | 0.65 (0.09) | 3.128  | 0.077 |
| 24hTST at 6 months                       | Shannon       | 4.53 (0.92)  | 4.81 (0.73) | 0.405  | 0.524 |
| Category 1: ≤13 h                        | Observed OTUs | 82 (35)      | 106 (38)    | 2.535  | 0.111 |
| Category 2: >13 h                        | FaithPD       | 7.56 (2.56)  | 9.58 (1.80) | 4.55   | 0.033 |
|                                          | Evenness      | 0.74 (0.11)  | 0.71 (0.11) | 0.146  | 0.702 |
| Proportion of night to 24TST at 6 months | Shannon       | 4.65 (0.66)  | 4.68 (1.05) | 0.626  | 0.429 |
| Category 1: ≤0.66                        | Observed OTUs | 107 (38)     | 76 (40)     | 5.559  | 0.018 |
| Category 2: >0.66                        | FaithPD       | 9.46 (2.46)  | 6.90 (3.08) | 11.676 | 0.001 |
|                                          | Evenness      | 0.72 (0.13)  | 0.73 (0.12) | 0.016  | 0.899 |
| Bedtime at 12 months                     | Shannon       | 5.18 (0.38)  | 4.54 (0.94) | 4.054  | 0.044 |
| Category 1: <21:00                       | Observed OTUs | 121 (14)     | 83 (45)     | 4.797  | 0.029 |
| Category 2: ≥21:00                       | FaithPD       | 10.32 (2.16) | 8.38 (3.43) | 3.854  | 0.05  |
|                                          | Evenness      | 0.75 (0.04)  | 0.71 (0.12) | 1.713  | 0.191 |
| Number of wakes at 12 months             | Shannon       | 4.55 (0.59)  | 4.81 (1.37) | 0.003  | 0.959 |
| Category 1: ≤1                           | Observed OTUs | 93 (47)      | 82 (43)     | 0.404  | 0.525 |
| Category 2: >1                           | FaithPD       | 8.70 (2.71)  | 8.40 (4.19) | 0.215  | 0.643 |
|                                          | Evenness      | 0.73 (0.09)  | 0.73 (0.15) | 0.05   | 0.823 |
| Max sleep bout at 12 months              | Shannon       | 4.89 (0.87)  | 4.47 (0.90) | 0.779  | 0.378 |
| Category 1: ≤9 h                         | Observed OTUs | 91 (37)      | 80 (53)     | 0.644  | 0.422 |
| Category 2: >9 h                         | FaithPD       | 9.00 (3.22)  | 7.96 (3.63) | 1.448  | 0.229 |
|                                          | Evenness      | 0.73 (0.12)  | 0.72 (0.11) | 0.161  | 0.688 |
| Night Sleep at 12 months                 | Shannon       | 4.65 (1.11)  | 4.65 (0.63) | 0.305  | 0.581 |
| Category 1: ≤10 h                        | Observed OTUs | 83 (47)      | 116 (21)    | 1.127  | 0.288 |
| Category 2: >10 h                        | FaithPD       | 8.38 (3.99)  | 9.35 (1.14) | 0.795  | 0.373 |
|                                          | Evenness      | 0.73 (0.13)  | 0.71 (0.06) | 0.002  | 0.966 |
| Daytime sleep at 12 months               | Shannon       | 4.49 (1.28)  | 4.75 (0.52) | 0.557  | 0.455 |
| Category 1: ≤3 h                         | Observed OTUs | 83 (52)      | 95 (36)     | 0.51   | 0.475 |
| Category 2: >3 h                         | FaithPD       | 8.02 (3.39)  | 9.01 (2.53) | 1.521  | 0.218 |
|                                          | Evenness      | 0.72 (0.13)  | 0.73 (0.05) | 0.237  | 0.626 |

|                                           |               |             |             |       |       |
|-------------------------------------------|---------------|-------------|-------------|-------|-------|
| Nap frequency at 12 months                | Shannon       | 4.55 (0.99) | 4.76 (0.75) | 1.498 | 0.221 |
| Category 1: $\leq 2$                      | Observed OTUs | 83 (44)     | 96 (41)     | 1.683 | 0.195 |
| Category 2: $> 2$                         | FaithPD       | 8.55 (3.14) | 9.00 (2.63) | 0.457 | 0.499 |
|                                           | Evenness      | 0.72 (0.12) | 0.75 (0.15) | 1.682 | 0.195 |
| 24hTST at 12 months                       | Shannon       | 4.49 (1.08) | 4.75 (0.56) | 1.147 | 0.284 |
| Category 1: $\leq 13$ h                   | Observed OTUs | 83 (51)     | 95 (38)     | 0.607 | 0.436 |
| Category 2: $> 13$ h                      | FaithPD       | 8.02 (3.41) | 9.01 (2.53) | 1.29  | 0.256 |
|                                           | Evenness      | 0.72 (0.13) | 0.73 (0.09) | 0.886 | 0.347 |
| Proportion of night to 24TST at 12 months | Shannon       | 4.55 (0.76) | 4.91 (1.06) | 1.038 | 0.308 |
| Category 1: $\leq 0.77$                   | Observed OTUs | 87 (41)     | 95 (41)     | 0.329 | 0.567 |
| Category 2: $> 0.77$                      | FaithPD       | 8.47 (3.47) | 8.87 (3.17) | 0.016 | 0.899 |
|                                           | Evenness      | 0.71 (0.10) | 0.75 (0.11) | 1.464 | 0.226 |
| RWG - Birth to 6 months                   | Shannon       | 4.81 (0.63) | 4.41 (0.87) | 2.55  | 0.11  |
| Category 1: No                            | Observed OTUs | 96 (39)     | 72 (34)     | 2.95  | 0.086 |
| Category 2: Yes                           | FaithPD       | 9.00 (3.11) | 6.81 (3.31) | 3.633 | 0.057 |
|                                           | Evenness      | 0.73 (0.12) | 0.72 (0.11) | 0.958 | 0.328 |
